# Supplementary material
Source: PubMed Central journal article supplement (PMC3656236)
Supplement: supp_me.2012-1334_Supplemental_Table_Figures_and_Legends.pdf [file supp_me.2012-1334_Supplemental_Table_Figures_and_Legends.pdf]

**Supplemental Table 1.** Oligo primers used for site-directed mutagenesis

| primers | Sequence 5'→3'                                  |
|---------|-------------------------------------------------|
| PRE1 F  | acatccattetgtttctgGAATTCcagcctcactctgtctac      |
| PRE1 R  | gtagacagagtgaggctgaGAATTCcagaaacagaatggatgt     |
| PRE2 F  | catttggtttaaatagtgacGAATTCaagggatgtgaaagagaaa   |
| PRE2 R  | atttctctttcacatcccttGAATTCgtcactatttaaacacaaatg |
| PRE3 F  | gtgagagggcctgggatccGAATTCtttcacataccaagtatg     |
| PRE3 R  | cataacttggtatgtgaaaGAATTCggatcccaggccctctcac    |
| PRE4 F  | attaaatcctttccaccgaggGAATTCgctgatggctgtgacag    |
| PRE4 R  | ctgtcacagccatcagcGAATTCcctcgggtgaaaggatttaat    |
| PRE5 F  | gtcctttcttgggatattGAATTCtggaatctagccaccacac     |
| PRE5 R  | gtgtggtggctagattccaGAATTCaatatcccaagagaaaggac   |
| PRE6 F  | cccttctcctagaggtcctGAATTCaactgaggtccaattccac    |
| PRE6 R  | gtggaattggacctcagttGAATTCaggacctctaggagaaggg    |
| Gata2 F | ctctcccactccccatCTCGAGgtgacttgacacactctg        |
| Gata2 R | cagagtgtgtcaagtcacCTCGAGatggggagtggaggag        |
| Ap2 F   | ctccccagctcccttttCTCGAGgggctaaggcttagtgg        |
| Ap2 R   | ccactaagccttagccCTCGAGaaaaggaggctggggag         |

**Supplemental Table 2.** Oligo primers used for the ChIP assays

| Primers/ location        | Amplified fragment (bp) | Sequence 5'→3'       |
|--------------------------|-------------------------|----------------------|
| 1F (-5655 to -5636)      | 169                     | TAAACAAGCAGGCACCTTCC |
| 1R (-5487 to -5506)      |                         | CCAAGGGTCTAGCAATTCCA |
| 2F (-5506 to -5487)      | 220                     | TGGAATTGCTAGACCCTTGG |
| 2R (-5287 to -5306)      |                         | CCTTTTGCTGATCCCACTGT |
| 3F (-5306 to -5287)      | 254                     | ACAGTGGGATCAGCAAAGG  |
| 3R (-5053 to -5072)      |                         | TCAGTCAGCTCTGAAGGGT  |
| 4F (-5072 to -5053)      | 209                     | ACCCCTTCAGAGCTGACTGA |
| 4R (-4864 to -4883)      |                         | GATTAAAGGGTGAGGGCACA |
| 5F (-4883 to -4864)      | 190                     | TGTGCCCTCACCTTTAATC  |
| 5R (-4694 to -4713)      |                         | TCTAGCCCCTGGGAAAGAAT |
| 6F (-4713 to -4694)      | 191                     | ATTCTTTCCAGGGGCTAGA  |
| 6R (-4523 to -4544)      |                         | ATAAGATGGGGAGTGGGAGG |
| Gata2- F(-4543 to -4525) | 167                     | CTCCTCCCACTCCCCATCT  |
| Gata2- R(-4375 to -4393) |                         | GACCACTAAGCCTTAGCCC  |

## Supplemental Figure Legends

**Supplemental FIG. 1.** Progesterone can stimulate the expression of the *lacZ* reporter gene as measured by quantifying  $\beta$ -galactosidase activity. The *lacZ* gene was introduced by recombineering into the RPI23 99o4 BAC that contains a ~220kb insert, including the entire mouse *Ednra* gene locus. Similar results were obtained with the RPI24-289k16 BAC. BACs were transfected by electroporation into Cos7 cells with or without PRB. Cells were cultured in presence of FBS for 48 hours before measuring the enzymatic activity.

**Supplemental FIG. 2.** Activation of the *Ednra* promoter activity measured by luciferase enzymatic assay following progesterone treatment. CHO-1 and Cos-7 cells were transfected with the pGL4.26 *Ednra* -8;-0.5 and progesterone receptor B (PRB) vectors then treated with 2ng/ml of progesterone. These cells responded similarly to the 293E cells, indicating the specificity of the response.

**Supplemental FIG. 3.** Example of ChIP PCR results. In figure 4, 5 and 6, only lane 3, 4, 5 and 6 are shown. Lane 4 shows a positive PCR control result. The band seen in lane 1, 2, 3, 5 and [-] are the primer dimmers. All ChIP experiments were repeated at least 3 times. All ChIP experiments were done following the same scheme except for Fig. 7E.

**Supplemental FIG. 4.** *PRE* and *GATA2* elements are present in the same upstream non-coding region of the human *EDNRA* gene.

**Supplemental Fig. 1, Zhang et al.**

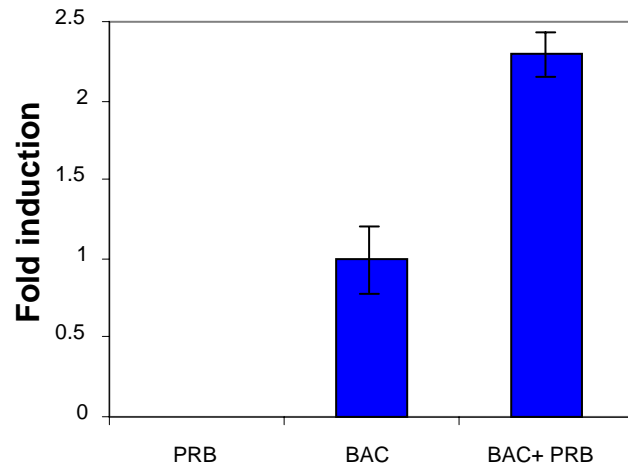

Supplemental Fig. 2, Zhang et al.

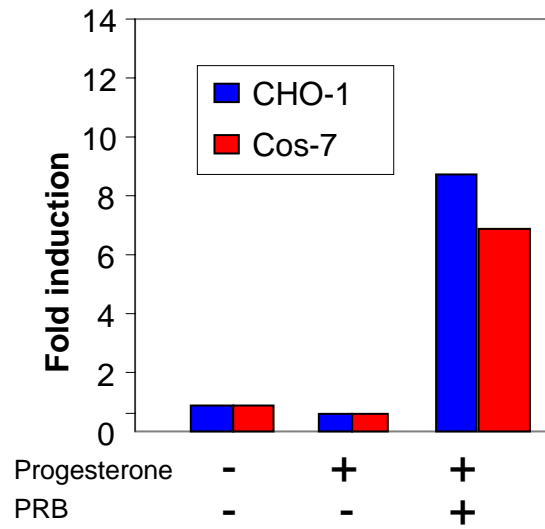

Supplemental Fig. 3, Zhang et al.

ChIP assay with anti-PRB for Gata2 site

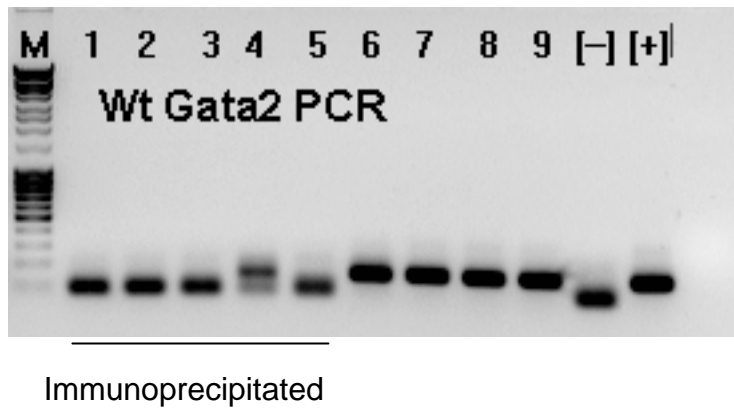

Lane:

1. Ednra-luc Vector
2. +Progesterone (P4)
3. +hPRB
4. +P4+hPRB
5. +P4+hPRB Ab control
6. Input of vector
7. Input of +P4
8. Input of +hPRB
9. Input of +P4+hpBR
10. (-) no DNA control
11. (+) BAC 99o4 or 289k16

Human

AAAAGTAGAATTGCTGGATCATAGGGTAATTTTATGTTTAATTTTGGAGGGCTGCCATGCT  
 GTTTTCCACAACCTGCTACACTATATTTTACATTGAGACTGGCAATGCACAAGGGTTCCAATTT  
 CTCAACATTCTTGCCAACACT**IGTTCI**TTGCTGTTTTGCTTTTTGTTTTACTATAATGGC**TATC**  
**CT**AATAGGTGTGAAGGAAGAATTTTAGTAAGT**AGTCCT**ACACCACAGTGAGATCAGCTGTC  
 TCAATAGGTGGGTCATGATGAATG**IGTTCI**AGCAAAGACTGGACAGATTGACATATTCAGAT  
 ATGCAGGTGATGCACTGTCCAAGTGTGTCTGGCCACAGAGTGAATAAGGGCTGAAATCC**AG**  
**CACA**TGTTTCACGGGCCAAGATGTGAACTGCCTCTTTTGGGAGGAAGCAGTAAGTTTTTCTT  
 TCCCGAAAATATTGTCAGCTTGCCAAGCCACATGCCCAAAGGGTCACCTTTTTTTAATATAA  
 ACAATGGCACTTATAAAAGCTATTAGTTATTCTGGTTGGCTGATTCTCCCTCCTAGAGAAGCT  
 GTAAGATTAGTGAACAGGGTAATATCTAGTCTAACCCCTATGATGGTTTTACAAAATGGTCCC  
 TAAATTTCTTTGACACTCCTCACACTAAGGGTTGGGCTCTATATACCCTCACCTTCAATCTGGG  
 ATTTGTGACTGCTTGACTAATAGAATCAAGCAGAAATGACACGGTGCCAGTTTCTGGGCCCA  
 GCCCTTAAGAACTGGCAGCTTCCACTTTCTGTCTCTGGGGACATT**CACTCT**TGGATCCCCG  
 CCACCATGCTGTGAGGAAGCCCAAACCACAAGTCTCCACAAGTCTTTGTGGAGAGACGCAC  
 GTGGAGAAAACTAACACTCAACACCAAGCAAGTGAAGTGTCTTGGAAGTGGATCCTCCAG  
 CCCCTGCTACATGGAGCAAAAACGAGCTGTCCAGACAGGCTCTGCCCAAACCTGCAGACTG  
 ATAAGCAGAGTAAATGAGTGTGTTATTTTAAGCCACTACGTTTTATAGTAATTTGTTTAGCT  
 GCAGCAGATAGCCGGAACAGCATGGGATATAACATGACCAGTGCTCCAACCTCACACTTCT  
 ACCATGTGCTGACTCTAGCAGTGCCTGAAGGACTCCAAGGCAGGCCTTCCCTGAGGAGACC  
 CCAGTTTTTACTCACATGTACAGGCAGTGGCCTTTGTCCCTCATCTCCTCTCCACCCCCAA  
 TTTA**GGATAAA**GTATCTGCCGTGATAAAGACGTTGAGACCCACTTTCTGTAAGGTCGGCTTC  
 TTCATTGTTGAATTTCTTGAGGTTTACGGAGCCACGCGCTGGAACCTTCCATAGTCTCTCC  
 TGAGGCTCCTTCTTTGCCCTGGGCTGGAGGTCTGTAGCCGTGGGATGCTGGCTACAAGGG**AC**  
**AAGA**TAGAAGCAAACCACCTGATCCAGTAAACTGCTGTCCACTTCGGCTCCTCAACGGCCTC  
 TAAGCTTAAGAGGGAGCACGCAAGCCAAGCAAAGGCGGCAGGGAAGACGGAGAAGAAACC  
 ACCCGTGGGCCCTGGCTCTGTGTCCAGTTGTTCCGTCACAGATCAAATCTGCCTGCACTAAG  
 AGGATGGGTTCCCTCTGCAAGGCCTTTCCGAATTCTGAG**CTTGT**CTGTCAAACCTCTACCCTCT  
 CTCCTCCACATCCCCCACCTTTTCTTTTCCAGGAAGGAAATAGTTAAAAAAGACTCCTGCCCTTC  
 AGGGCCTGGAAGGGGGCGGCAGCTTTGTGCTTTTTAGTGGCCGCGTCCAGGATAGCTGGAA  
 GGTTAGGAC

Legend:

**Red**: PRE elements**Teal**: Partially conserved PRE elements**Yellow**: Closely aligning and conserved GATA element
